# Supplementary material for: Amine-functionalized multi-walled carbon nanotubes (EDA-MWCNTs) for electrochemical water splitting reactions
Source: Royal Society of Chemistry journal article supplement (doi:10.1039/d0nj05479h), 2021-01-01
Supplement: d0nj05479h1.pdf [file d0nj05479h1.pdf]

## Supporting Information

### **Amine Functionalized Multi-Walled Carbon Nanotubes (EDA-MWCNTs) for Electrochemical Water Splitting Reactions.**

Shankar S. Narwade, Shivsharan M. Mali and Bhaskar R. Sathe\*

Department of Chemistry, Dr. Babasaheb Ambedkar Marathwada University, Aurangabad-431 004 (MS)  
India.

Email: [bhaskarsathe@gmail.com](mailto:bhaskarsathe@gmail.com)

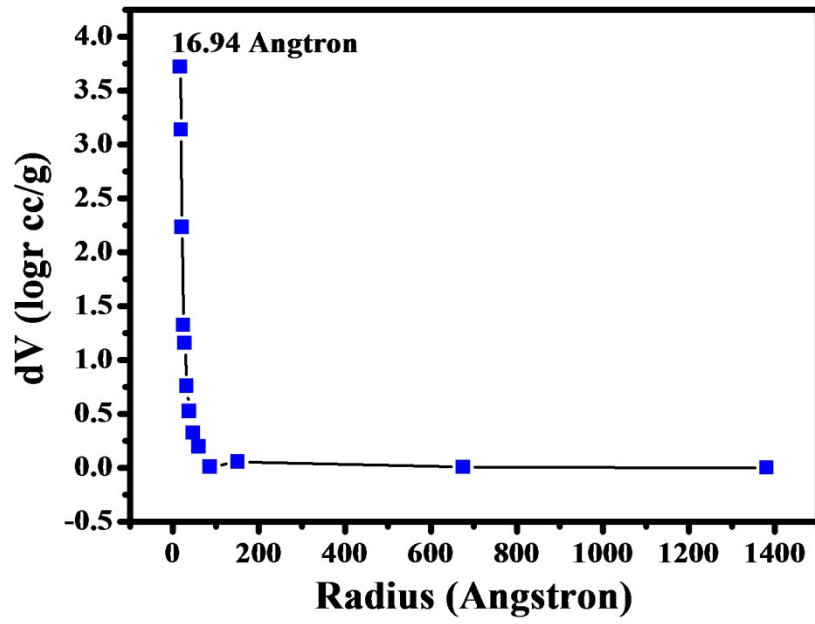

**Fig. S1:** BJH Pore size distribution curve of EDA-MWCNTs having 16.94 Angstrom it will convert in 1.6 nm pore size of EDA-MWCNTs.

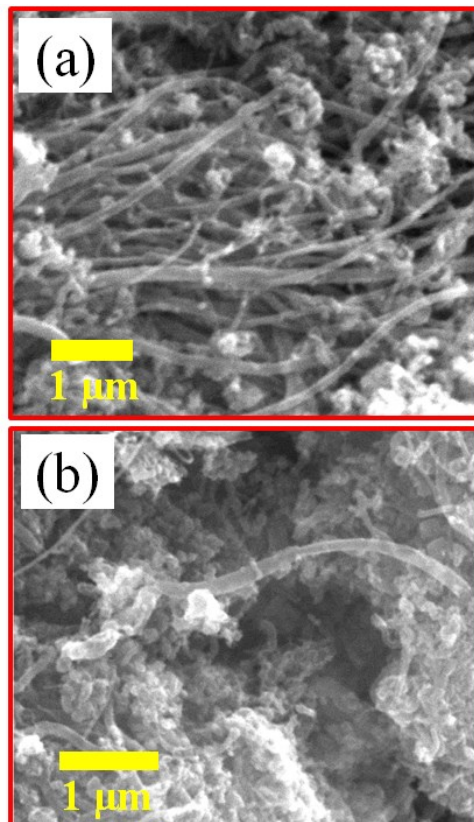

**Fig.S2:** Scanning electron microscopy (SEM) of (a) O-MWCNTs and (b) EDA-MWCNTs.

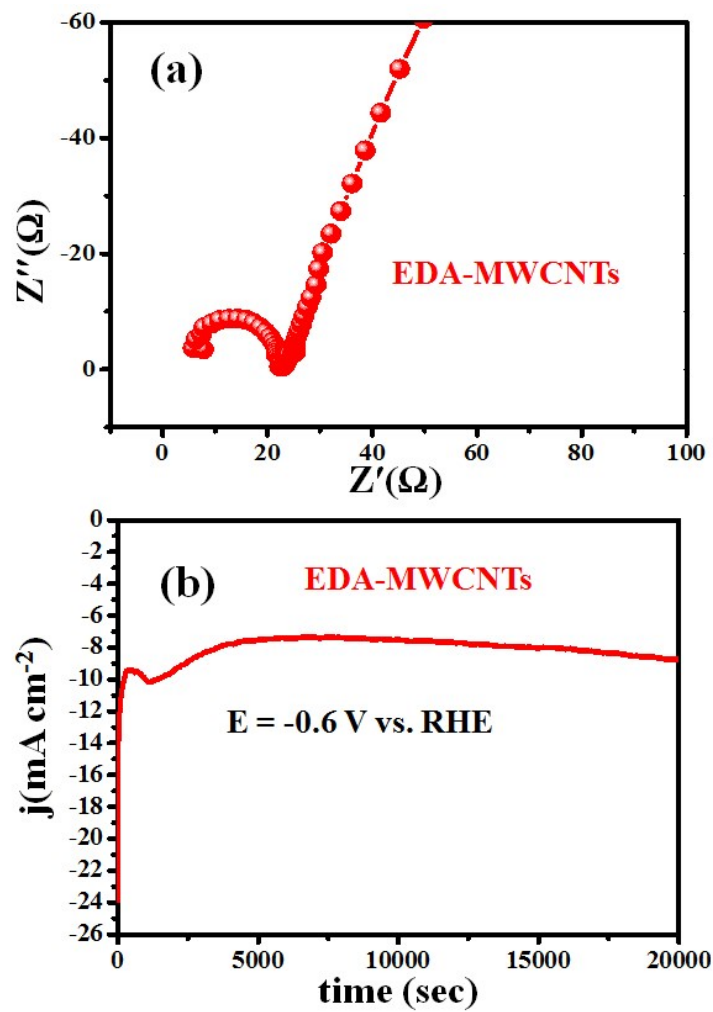

**Fig.S3:** (a) The electrochemical activities of EDA-MWCNTs were studied electrochemical impedance spectra 20.4  $\Omega$ EIS (20.4  $\Omega$ ) in 0.5 M  $\text{H}_2\text{SO}_4$  solutions for HER. (b) Chronoamperometric (i-t) response of EDA-MWCNTs nanomaterial at potential - 0.6 V vs RHE at 50 mV/s in 0.5 M  $\text{H}_2\text{SO}_4$  for 20000 s.

---

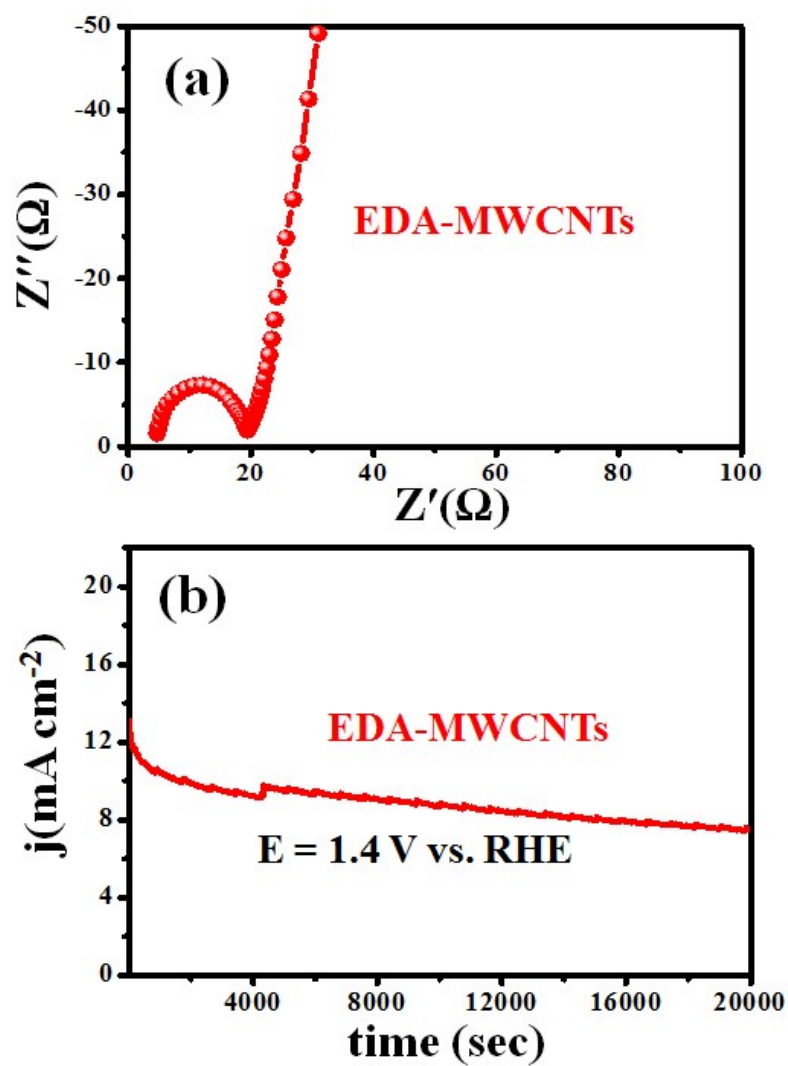

**Fig.S4:** (a) the electrochemical impedance of EDA-MWCNTs were studied electrochemical impedance spectra (20  $\Omega$ ) in 0.5 M KOH electrolyte for OER. (b) Shows i-t amperometry (20000 sec) of EDA-MWCNTs.

---
